# Supplementary material
Source: PubMed Central journal article supplement (PMC3321868)

## Supplemental Figures

**Figure S1. Increased levels of the transcription factor T-bet correlate with increased levels of Tim-3.** Resting NK cells (n=3) were stimulated with IL-2 (5 ng/mL), IL-15 (5 ng/mL), IL-12 (5 ng/mL), IL-18 (5 ng/mL) and IL-12 (1 ng/mL)+IL-18 (10ng/mL) for 4 hours and levels of T-bet and Tim-3 were evaluated by qRT- PCR. The change in relative expression levels between resting and cytokine stimulated conditions is represented on the y-axis and was calculated using the following formula: Fold Change ( $\Delta\Delta CT$ ) =  $(2^{\Delta\Delta CT_{\text{sample}} (\text{resting control} - \text{cytokine stimulated})}) / 2^{\Delta\Delta CT_{\text{reference}} (\text{resting control} - \text{cytokine stimulated})}$ ].

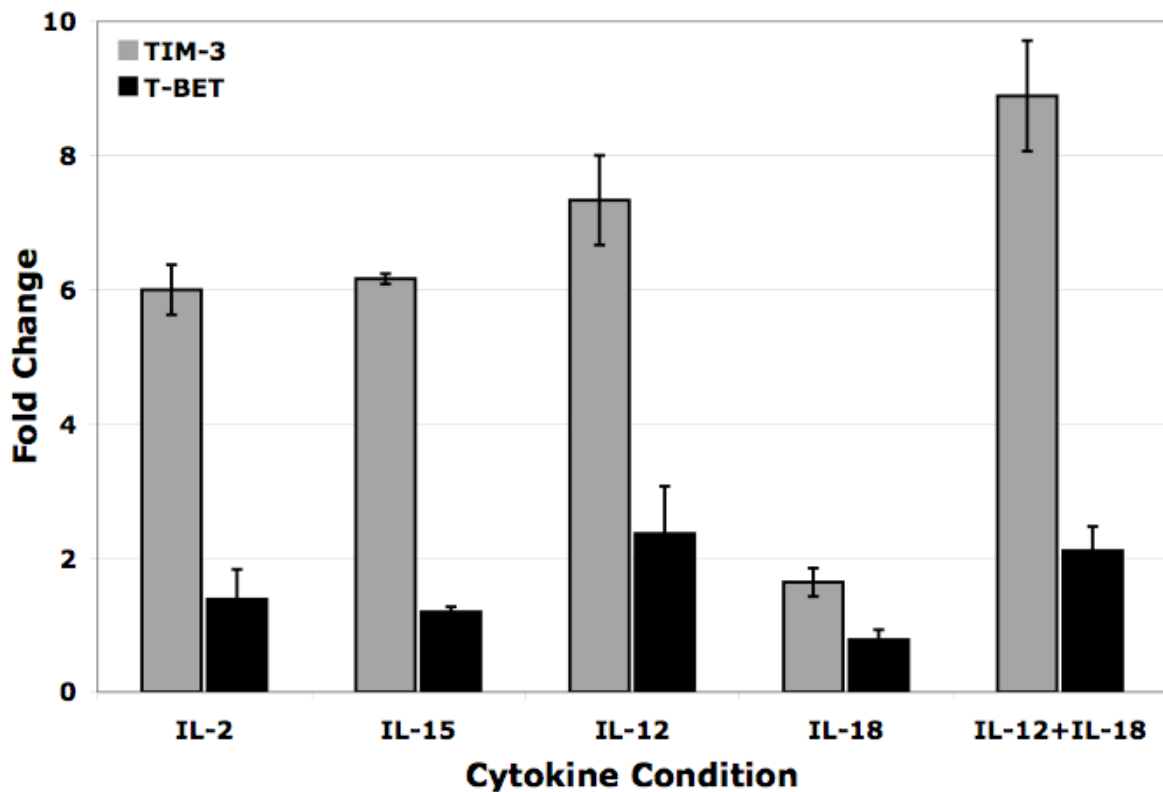

**Figure S2. IFN- $\gamma$  production induced by rhGal-9 in resting NK cells involves MEK1/2 and NF $\kappa$ B signaling pathways.** To evaluate signaling pathways involved in rhGal-9 induced IFN- $\gamma$  production, resting NK cells were stimulated with 20 nM rhGal-9 for 4 hours in the presence of 0.1% DMSO control, 10  $\mu$ M NF $\kappa$ B inhibitors (BAY-11 [Santa Cruz Biotechnology, sc-202490] and JSH-23 [Santa Cruz Biotechnology, sc-222061]) or 10  $\mu$ M MEK1/2 inhibitor (U0126 [Promega, V112A]) and IFN- $\gamma$  production was measured by FACS. (Flow plots are representative of two donors.)

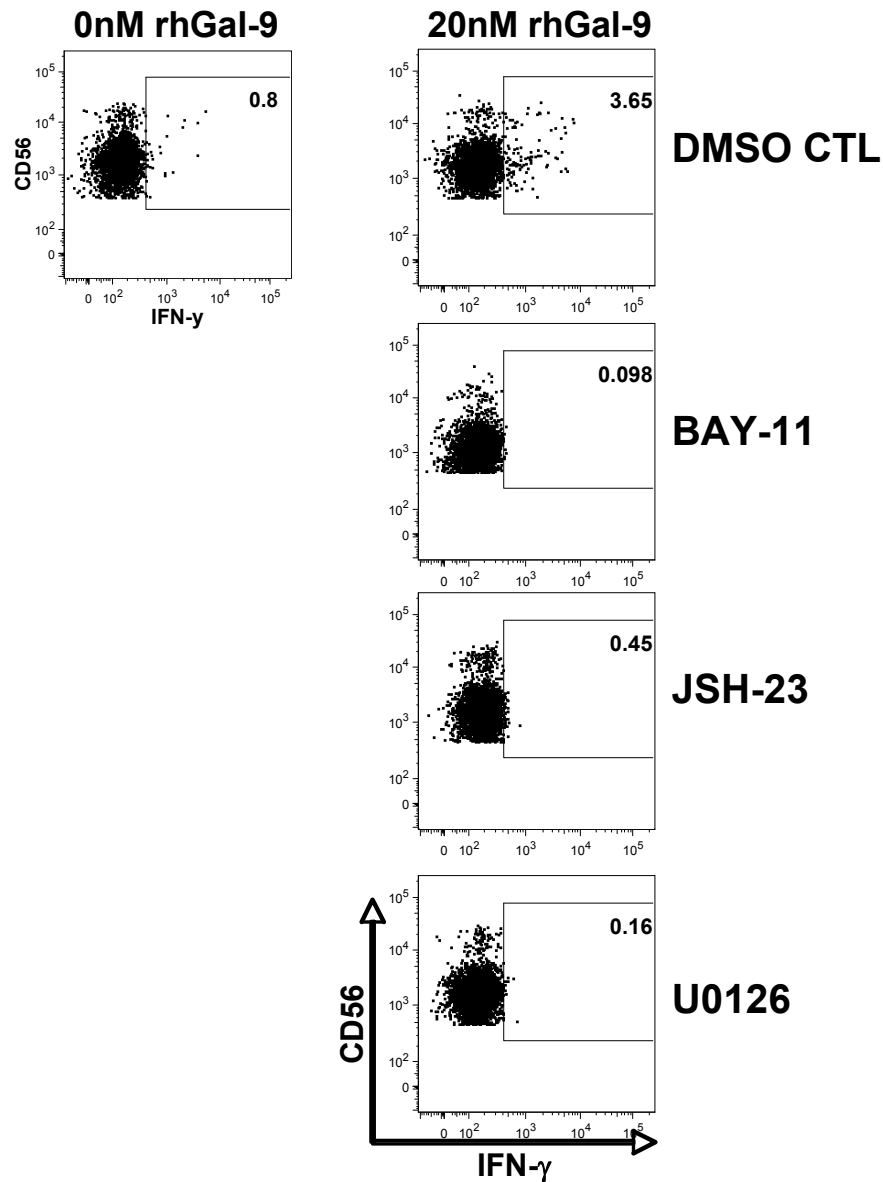

Supplement: supp_blood-2011-06-360321_blood-2011-06-360321-1.pdf [file supp_blood-2011-06-360321_blood-2011-06-360321-1.pdf]
